# Supplementary material
Source: ML conference proceedings conference paper supplement (https://openreview.net/forum?id=iAWNOXfLz0)
Supplement: supplementary_material [file attachment]

# 1 Checklist

- 2 1. For all authors...
  - 3 (a) Do the main claims made in the abstract and introduction accurately reflect the paper's  
4 contributions and scope? [Yes] See Section 4.
  - 5 (b) Did you describe the limitations of your work? [Yes] See Appendix F.
  - 6 (c) Did you discuss any potential negative societal impacts of your work? [Yes] See  
7 Appendix G.
  - 8 (d) Have you read the ethics review guidelines and ensured that your paper conforms to  
9 them? [Yes]
- 10 2. If you are including theoretical results...
  - 11 (a) Did you state the full set of assumptions of all theoretical results? [N/A]
  - 12 (b) Did you include complete proofs of all theoretical results? [N/A]
- 13 3. If you ran experiments...
  - 14 (a) Did you include the code, data, and instructions needed to reproduce the main experi-  
15 mental results (either in the supplemental material or as a URL)? [Yes] We open the  
16 source code publicly after the acceptance (<https://github.com/ahyungshin/AnoFormer>).
  - 17 (b) Did you specify all the training details (e.g., data splits, hyperparameters, how they  
18 were chosen)? [Yes] See Section 4, Appendix A, and Appendix B.
  - 19 (c) Did you report error bars (e.g., with respect to the random seed after running experi-  
20 ments multiple times)? [Yes] See Figure 3.
  - 21 (d) Did you include the total amount of compute and the type of resources used (e.g., type  
22 of GPUs, internal cluster, or cloud provider)? [Yes] See Appendix D.
- 23 4. If you are using existing assets (e.g., code, data, models) or curating/releasing new assets...
  - 24 (a) If your work uses existing assets, did you cite the creators? [Yes] See Section 4 and  
25 Reference.
  - 26 (b) Did you mention the license of the assets? [Yes]
  - 27 (c) Did you include any new assets either in the supplemental material or as a URL? [Yes]  
28 See Appendix A
  - 29 (d) Did you discuss whether and how consent was obtained from people whose data you're  
30 using/curating? [Yes]
  - 31 (e) Did you discuss whether the data you are using/curating contains personally identifiable  
32 information or offensive content? [Yes]
- 33 5. If you used crowdsourcing or conducted research with human subjects...
  - 34 (a) Did you include the full text of instructions given to participants and screenshots, if  
35 applicable? [N/A]
  - 36 (b) Did you describe any potential participant risks, with links to Institutional Review  
37 Board (IRB) approvals, if applicable? [N/A]
  - 38 (c) Did you include the estimated hourly wage paid to participants and the total amount  
39 spent on participant compensation? [N/A]

---

# Supplementary:

## AnoFormer: Time Series Anomaly Detection using Transformer-based GAN with Two-Step Masking

---

Anonymous Author(s)

Affiliation

Address

email

40 Here we provide a brief outline of the appendices. In Appendix A, we provide details of datasets. In  
41 Appendix B, we provide additional experiments about hyperparameter sensitivity. In Appendix C, we  
42 discuss how to select the layer for entropy-based re-masking strategy. In Appendix D, we study the  
43 effectiveness of our embedding method. In Appendix E and F, we discuss the limitations and broader  
44 impacts of our methods.

### 45 A Dataset

46 We used a total of four time series anomaly detection datasets. In the training set, all datasets contain  
47 normal data only. Table 1 shows details of each dataset.

- 48 1. NeurIPS-TS<sup>1</sup>: This is the dataset which introduces a new taxonomy for time series outliers.  
49 It includes total of five different time series anomaly scenarios that cover point-global,  
50 point-contextual, pattern-shapelet, pattern-seasonal, and pattern-trend. We created our own  
51 dataset using the open source code. Datasets will be made public after the review.
- 52 2. MIT-BIH Arrhythmia Database<sup>2</sup>: This database contains 48 ECG records of test subjects  
53 from Beth Israel Hospital. As recommended by the Association for the Advancement of  
54 Medical Instrumentation (AAMI) [1], there are five classes that are Normal (N), Supraventricular  
55 Ectopic Beat (S), Ventricular Ectopic Beat (V), Fusion (F), and Unknown Beat  
56 (Q).
- 57 3. 2D-gesture<sup>3</sup>: This dataset contains time series of X and Y coordinates of an actor’s right  
58 hand. The actor grabs a gun from his hip-mounted holster, and then shoots at the target.  
59 Finally, the actor returns it to the holster. The anomalous region is that the actor misses the  
60 holster when returning the gun.
- 61 4. Power-demand<sup>4</sup>: This is the dataset measuring the power consumption for the Dutch  
62 research facility for the entire year of 1997.

### 63 B Hyperparameter Sensitivity

64 For the proposed AnoFormer, we set the quantization resolution  $K$  as 400 in the main paper. Moreover,  
65 for the proposed two-step masking, we set the mask ratio  $r_m$  as 50%, the mask length  $l_m$  as 10% of  
66 the sequence length, the stride of sliding window as a half of  $l_m$ , and the re-masking ratio as 50% of  
67 the parts masked in Step 1. We further analyzed the sensitivity of hyperparameters in AnoFormer.

<sup>1</sup><https://github.com/datamllab/tods/tree/benchmark>

<sup>2</sup><https://physionet.org/content/mitdb/1.0.0/>,

<sup>3</sup><https://www.cs.ucr.edu/~eamonn/discords/>.

<sup>4</sup><https://www.cs.ucr.edu/~eamonn/discords/>.

Table 1: Statistical details of four datasets.

| Datasets     |                      | Dimension | Length | # Training | # Validation | # Test |
|--------------|----------------------|-----------|--------|------------|--------------|--------|
| NeurIPS-TS   | (A) Point-Global     | 1         | 100    | 18,000     | 8,954        | 11,927 |
|              | (B) Point-Contextual | 1         | 100    | 18,000     | 8,954        | 11,927 |
|              | (C) Pattern-Shapelet | 1         | 100    | 18,000     | 8,954        | 11,927 |
|              | (D) Pattern-Seasonal | 1         | 100    | 18,000     | 8,954        | 11,927 |
|              | (E) Pattern-Trend    | 1         | 100    | 18,000     | 8,954        | 11,927 |
| MIT-BIH      |                      | 1         | 320    | 62,436     | 8,025        | 27,107 |
| 2D-gesture   |                      | 2         | 64     | 1,093      | 469          | 46     |
| Power-demand |                      | 1         | 512    | 1,088      | 467          | 224    |

68 First, we provide the performances and the visualization results for the different number of  $K$  in  
69 Table 2. We found that our model is not sensitive to the different values of  $K$ , and we set  $K = 400$   
70 consistently for all experiments because this is visually similar to the original signal.

Table 2: Sensitivity for the quantization resolution.

| # of tokens | 100    | 200    | 300    | 400    | 500    |
|-------------|--------|--------|--------|--------|--------|
| AUROC       | 0.9791 | 0.9806 | 0.9793 | 0.9758 | 0.9719 |
| AUPRC       | 0.9880 | 0.9883 | 0.9874 | 0.9854 | 0.9826 |
| F1 score    | 0.9453 | 0.9435 | 0.9388 | 0.9400 | 0.9289 |

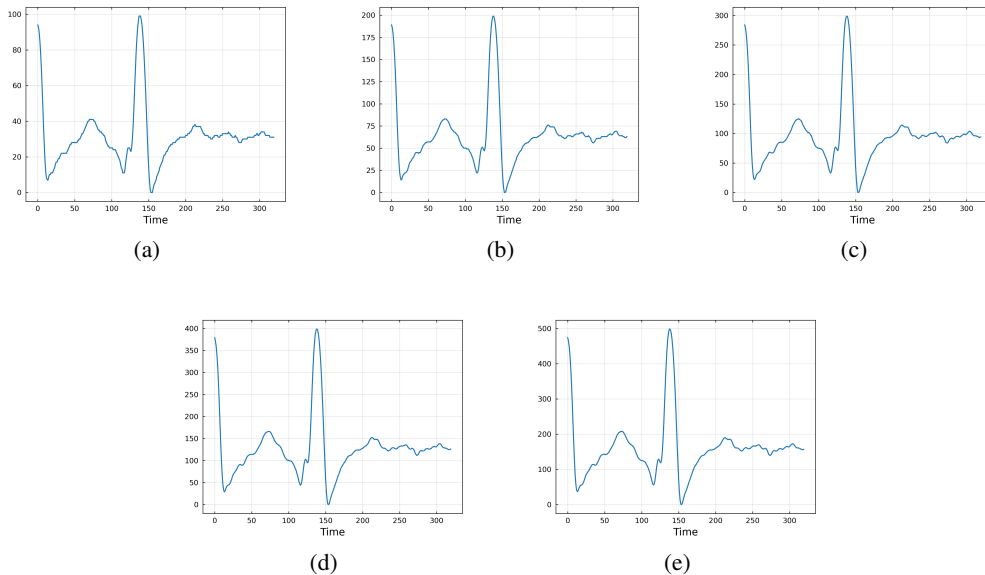

Figure 1: Visualization for each  $K$  in MIT-BIH dataset: (a)  $K = 100$ , (b)  $K = 200$ , (c)  $K=300$ , (d)  $K = 400$ , and (e)  $K = 500$ . When  $K$  is 100 or 200, those signals look discrete ones.

71 Table 3 shows the performances for the different strides of sliding window  $s_m$  while fixing the length  
72 of the mask section  $l_m$  as 10% of  $T$ . As already explained, the number of masks  $n_m$  in the mask  
73 pool was automatically determined by in Equation 1 by using the values of  $s_m$  and  $l_m$ . Our model

Table 3: Sensitivity for the stride of the sliding window.

| Stride    | 3      | <b>5</b>      | 10     |
|-----------|--------|---------------|--------|
| # of pool | 8      | <b>4</b>      | 2      |
| AUROC     | 0.9714 | <b>0.9758</b> | 0.9721 |
| AUPRC     | 0.9828 | <b>0.9854</b> | 0.9834 |
| F1 score  | 0.9344 | <b>0.9400</b> | 0.9315 |

74 performed better when the stride was 5, which is a half of  $l_m$ .

$$n_m = 2 \times \left\lceil \frac{l_m}{s_m} \right\rceil. \quad (1)$$

75 We also present the compared results depending on the different re-masking ratios in Table 4. When  
 76 we re-masked a half of the masked parts in Step 1 for the proposed entropy-based re-masking, the  
 77 performance was the highest among them. To sum up, AnoFormer shows the robust performances to  
 the changes of the hyperparameters.

Table 4: Sensitivity for the entropy-based re-masking ratio.

| entropy-based<br>re-masking ratio | +10%   | +20%   | <b>+25%</b>   | +30%   | +40%   |
|-----------------------------------|--------|--------|---------------|--------|--------|
| AUROC                             | 0.9682 | 0.9726 | <b>0.9758</b> | 0.9615 | 0.9285 |
| AUPRC                             | 0.9797 | 0.9841 | <b>0.9854</b> | 0.9747 | 0.9538 |
| F1 score                          | 0.9291 | 0.9363 | <b>0.9400</b> | 0.9115 | 0.8823 |

78

## 79 C How to Select the Layers for Entropy-based Re-masking?

80 For entropy-based re-masking, we average the entropies from all layers. Attentions are often uniformly  
 81 distributed in the first block of Transformer [2]. We further analyzed the performance of the last-layer  
 82 usage. This is because the last layer reflects the characteristics of the data the best. As shown in Table  
 83 5, using all layers for re-masking achieved the best performance. This results show that each layer of  
 transformer contains meaningful information to reconstruct the signal.

Table 5: Experiment to select layers to calculate entropy.

| Layer Selection   | AUROC         | AUPRC         | F1 score      |
|-------------------|---------------|---------------|---------------|
| Last layer        | 0.9735        | 0.9846        | 0.9371        |
| <b>All layers</b> | <b>0.9758</b> | <b>0.9854</b> | <b>0.9400</b> |

84

## 85 D Effectiveness of the Proposed Embedding Method

86 The existing transformer-based time series processing methods utilize linear layers for token embed-  
 87 ding and use the mean squared error to reconstruct time series data. Different from these studies, we  
 88 apply the embedding matrix to process time series data. To this end, we replace the reconstruction loss  
 89 to the cross-entropy. In other words, we change the regression problem to the simple classification  
 90 one. We further examine the effects of the proposed embedding method. As shown in Figure 2,  
 91 using embedding matrix achieved better performance with a large margin and converged quickly. We  
 92 empirically demonstrated that the proposed embedding strategy is effective to process time series  
 93 data and is superior to the reconstruction-based anomaly detection problem.

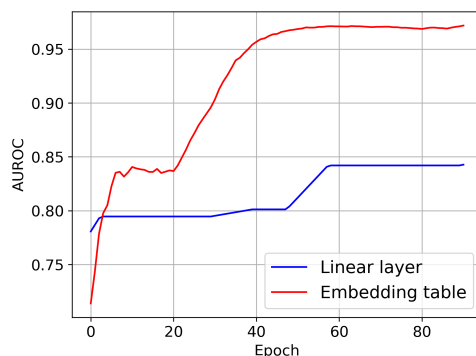

Figure 2: Performance comparison of different embedding methods.

94 **E Limitation**

95 Since we combine the signals generated through Step 1 and Step 2 for the final output, there is a  
 96 problem of noisiness at the mask boundary. In addition, in Step 2 of the proposed masking method,  
 97 we provide entropy-based feedback to the masked part in Step 1, but we do not provide feedback  
 98 on the exclusive part of Step 2. Moreover, there is a problem that the inference time is long because  
 99 we perform the forwarding operation twice for one signal. However, this is not a big deal because  
 100 accuracy is more important than detecting in real time. In the future, we plan to solve those problems.

101 **F Broader Impact**

102 Recently, many researches actively conduct anomaly detection using deep learning. Accordingly,  
 103 not only does the performance improve, but many industrial areas apply anomaly detection model  
 104 effectively in the real world. Anomaly detection is generally used positively. It improves safety and  
 105 prevents potential risks and financial losses by detecting anomalies in healthcare, manufacturing, and  
 106 autonomous driving, etc. However, the system can be stuck into confirmation bias, *i.e.*, the model can  
 107 ignore new forms of anomalies. We can cope with this situation by updating the model periodically  
 108 for new knowledge.

109 **References**

110 [1] AAMI. Testing and reporting performance results of cardiac rhythm and st segment measurement  
 111 algorithms. *ANSI/AAMI EC38*, 1998, 1998.

112 [2] Edward Choi, Zhen Xu, Yujia Li, Michael Dusenberry, Gerardo Flores, Emily Xue, and Andrew  
 113 Dai. Learning the graphical structure of electronic health records with graph convolutional  
 114 transformer. In *Proceedings of the AAAI conference on artificial intelligence*, volume 34, pages  
 115 606–613, 2020.
